# Supplementary material
Source: MDPI journal article supplement (https://www.mdpi.com/2571-9408/4/4/217)
Supplement: s1 [file s1]

**Table S1.** The list of the 51 shipwreck databases included in the research.

| a/a | Name of the Database                  | Geographical coverage | Historical data | Accurate wrecks' position | Mapping | Thematic orientation | Private or public initiative | Use of Crowdsourcing | Protection status | Data accessibility |
|-----|---------------------------------------|-----------------------|-----------------|---------------------------|---------|----------------------|------------------------------|----------------------|-------------------|--------------------|
| 1   | Wreck.eu                              | International         | Yes             | Yes                       | Yes     | No                   | Private                      | Yes                  | no                | No                 |
| 2   | NADL                                  | International         | Yes             | Yes                       | Yes     | Yes                  | Private                      | Yes                  | Yes               | Yes                |
| 3   | MASS                                  | International         | Yes             | No                        | Yes     | Yes                  | Public                       | No                   | No                | Yes                |
| 4   | Shipintex.org                         | International         | Yes             | No                        | No      | No                   | Private                      | No                   | No                | No                 |
| 5   | UBOAT.net                             | International         | Yes             | Yes                       | Yes     | Yes                  | Private                      | Yes                  | No                | Yes                |
| 6   | Royal Navy wooden shipwrecks database | International         | Yes             | No                        | No      | Yes                  | Private                      | No                   | No                | Yes                |
| 7   | Brasil Mergulho                       | National              | Yes             | No                        | Yes     | No                   | Private                      | Yes                  | No                | Yes                |
| 8   | Shipwreck Investigations Database     | National              | Yes             | No                        | No      | No                   | Public                       | No                   | No                | Yes                |
| 9   | Nautical Museum of the Atlantic       | Regional              | Yes             | No                        | No      | No                   | Private                      | No                   | No                | Yes                |
| 10  | NAVIS II                              | Continental           | Yes             | No                        | No      | Yes                  | Private                      | No                   | No                | Yes                |
| 11  | NAVIS I                               | Continental           | Yes             | No                        | No      | Yes                  | Private                      | No                   | No                | Yes                |
| 12  | EU Atlas of the Sea                   | Continental           | No              | No                        | No      | No                   | Public                       | No                   | No                | Yes                |
| 13  | MACHU                                 | National              | No              | Yes                       | Yes     | No                   | Public                       | No                   | No                | Yes                |
| 14  | EMODNET                               | Continental           | No              | Yes                       | Yes     | No                   | Public                       | No                   | Yes               | Yes                |
| 15  | Inventories of the DRASSM             | National              | Yes             | No                        | Yes     | No                   | Public                       | No                   | No                | Yes                |
| 16  | l'Atlas archéologique des 2 Mers      | Regional              | No              | No                        | Yes     | No                   | Private                      | No                   | No                | Yes                |
| 17  | National Maritime Museum of Norway    | National              | Yes             | No                        | No      | No                   | Private                      | No                   | No                | No                 |
| 18  | Irish Wreck Database                  | National              | Yes             | Yes                       | Yes     | No                   | Private                      | No                   | No                | Yes                |
| 19  | INFOMAR                               | National              | No              | Yes                       | Yes     | No                   | Private                      | No                   | No                | Yes                |
| 20  | Wreck Inventory of Ireland Database   | National              | Yes             | Yes                       | Yes     | No                   | Public                       | No                   | Yes               | Yes                |
| 21  | Archeomar Project                     | National              | Yes             | Yes                       | No      | No                   | Public                       | No                   | Yes               | No                 |
| 22  | Archeosub                             | Regional              | No              | No                        | No      | No                   | Private                      | No                   | No                | Yes                |
| 23  | Baltacar                              | Regional              | Yes             | No                        | Yes     | No                   | Private                      | No                   | No                | Yes                |
| 24  | Britain National Archives             | National              | Yes             | No                        | No      | No                   | Private                      | No                   | No                | Yes                |
| 25  | UK Diving                             | National              | Yes             | Yes                       | Yes     | No                   | Private                      | Yes                  | No                | Yes                |

|    |                                                                                                        |          |     |     |     |     |         |     |     |     |
|----|--------------------------------------------------------------------------------------------------------|----------|-----|-----|-----|-----|---------|-----|-----|-----|
| 26 | UK South Coast WWI Shipwrecks                                                                          | National | Yes | No  | Yes | Yes | Private | No  | No  | Yes |
| 27 | The Oxford Roman Economy Project                                                                       | National | Yes | No  | No  | Yes | Private | No  | No  | Yes |
| 28 | NOAA                                                                                                   | National | Yes | Yes | Yes | No  | Public  | No  | No  | Yes |
| 29 | MBNMS                                                                                                  | Regional | No  | No  | No  | No  | Public  | No  | No  | Yes |
| 30 | Gulf of the Farallones National Marine Sanctuary and Cordell Banks National Marine Sanctuary Shipwreck | Regional | Yes | No  | No  | No  | Public  | No  | No  | Yes |
| 31 | Olympic Coast National Marine Sanctuary Shipwreck                                                      | Regional | Yes | No  | No  | No  | Public  | No  | No  | Yes |
| 32 | California State Lands Commission                                                                      | Regional | Yes | No  | No  | No  | Public  | No  | No  | Yes |
| 33 | Wisconsin Shipwreck Database                                                                           | Regional | Yes | Yes | Yes | No  | Private | No  | No  | Yes |
| 34 | Minnesota's Historic Shipwrecks                                                                        | Regional | Yes | No  | No  | Yes | Private | No  | No  | Yes |
| 35 | Florida's Underwater Archaeological Preserves                                                          | Regional | Yes | No  | No  | No  | Public  | No  | Yes | Yes |
| 36 | Underwater Historic Preserves-Vermont                                                                  | Local    | Yes | Yes | No  | No  | Private | No  | No  | Yes |
| 37 | Delaware New Jersey Maritime Museum's Shipwreck Database                                               | Regional | Yes | Yes | No  | No  | Private | No  | No  | Yes |
| 38 | BOEM                                                                                                   | National | Yes | No  | No  | No  | Public  | No  | No  | Yes |
| 39 | Alaska Shipwrecks                                                                                      | National | Yes | No  | No  | No  | Private | No  | No  | Yes |
| 40 | Australasian Underwater Cultural Heritage Database                                                     | National | Yes | Yes | Yes | No  | Public  | Yes | Yes | Yes |
| 41 | NSW database                                                                                           | Regional | Yes | Yes | Yes | No  | Public  | No  | Yes | Yes |

|    |                                                                        |               |     |     |     |    |         |    |     |     |
|----|------------------------------------------------------------------------|---------------|-----|-----|-----|----|---------|----|-----|-----|
| 42 | Western Australian Museum database                                     | Regional      | Yes | No  | Yes | No | Public  | No | No  | Yes |
| 43 | The Red Sea Wreck Project                                              | Continental   | Yes | Yes | No  | No | Private | No | No  | Yes |
| 44 | Shipwreck Asia                                                         | Continental   | No  | No  | No  | No | Private | No | No  | Yes |
| 45 | Shipwreck Registry                                                     | International | Yes | Yes | No  | No | Private | No | No  | No  |
| 46 | New Jersey maritime museum                                             | Regional      | No  | Yes | No  | No | Private | No | No  | Yes |
| 47 | Baltic and Nordic wrecks and shipfinds                                 | National      | Yes | No  | No  | No | Private | No | No  | Yes |
| 48 | Permanent list of declared archeological sites and monuments of Greece | National      | No  | Yes | No  | No | Public  | No | Yes | Yes |
| 49 | Grafas Diving Database                                                 | Regional      | Yes | No  | No  | No | Private | No | No  | Yes |
| 50 | Samos Scuba Divers Association                                         | Local         | No  | No  | Yes | No | Private | No | No  | Yes |
| 51 | Dive Planet Blue                                                       | Local         | No  | No  | Yes | No | Private | No | No  | Yes |
